# Supplementary material for: Pleysteinite, [(H2O)0.5K0.5]2Mn2Al3(PO4)4F2(H2O)10 ⋅ 4H2O, the Al analogue of benyacarite, from the Hagendorf-Süd pegmatite, Oberpfalz, Bavaria, Germany
Source: Copernicus journal article supplement (doi:10.5194/ejm-35-189-2023), 2023-03-27

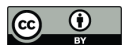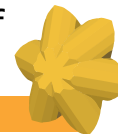

*Supplement of*

**Pleysteinite,  $[(\text{H}_2\text{O})_{0.5}\text{K}_{0.5}]_2\text{Mn}_2\text{Al}_3(\text{PO}_4)_4\text{F}_2(\text{H}_2\text{O})_{10} \cdot 4\text{H}_2\text{O}$ ,  
the Al analogue of benyacarite, from the Hagendorf-Süd  
pegmatite, Oberpfalz, Bavaria, Germany**

Ian E. Grey et al.

*Correspondence to:* Ian E. Grey ([ian.grey@csiro.au](mailto:ian.grey@csiro.au))

The copyright of individual parts of the supplement might differ from the article licence.

## checkCIF/PLATON report

You have not supplied any structure factors. As a result the full set of tests cannot be run.

THIS REPORT IS FOR GUIDANCE ONLY. IF USED AS PART OF A REVIEW PROCEDURE FOR PUBLICATION, IT SHOULD NOT REPLACE THE EXPERTISE OF AN EXPERIENCED CRYSTALLOGRAPHIC REFEREE.

No syntax errors found.      CIF dictionary      Interpreting this report

### Datablock: I

---

|                        |                                                  |                                              |                |
|------------------------|--------------------------------------------------|----------------------------------------------|----------------|
| Bond precision:        | Mn- O = 0.0042 A                                 | Wavelength=0.71073                           |                |
| Cell:                  | a=10.4133 (8)                                    | b=20.5242 (17)                               | c=12.2651 (14) |
|                        | alpha=90                                         | beta=90                                      | gamma=90       |
| Temperature:           | 294 K                                            |                                              |                |
|                        | Calculated                                       | Reported                                     |                |
| Volume                 | 2621.4 (4)                                       | 2621.4 (4)                                   |                |
| Space group            | P b c a                                          | P b c a                                      |                |
| Hall group             | -P 2ac 2ab                                       | -P -2xab;-2                                  |                |
|                        | Al7.73 F8 Fe2.52 Mn8 O104                        |                                              |                |
| Moiety formula         | P16 Ti1.75, 20.216(O),<br>3.784(K)               | ?                                            |                |
| Sum formula            | Al7.73 F8 Fe2.52 K3.78 Mn8<br>O124.22 P16 Ti1.75 | K0.47 Mn Fe0.32 Ti0.22<br>Al10.97 P2 O15.5 F |                |
| Mr                     | 3655.56                                          | 456.90                                       |                |
| Dx, g cm <sup>-3</sup> | 2.316                                            | 2.316                                        |                |
| Z                      | 1                                                | 8                                            |                |
| Mu (mm <sup>-1</sup> ) | 2.021                                            | 2.021                                        |                |
| F000                   | 1782.2                                           | 1778.0                                       |                |
| F000'                  | 1790.36                                          |                                              |                |
| h, k, lmax             | 14, 29, 17                                       | 13, 26, 16                                   |                |
| Nref                   | 3895                                             | 3310                                         |                |
| Tmin, Tmax             | 0.836, 0.939                                     | 0.929, 1.000                                 |                |
| Tmin'                  | 0.801                                            |                                              |                |

Correction method= # Reported T Limits: Tmin=0.929 Tmax=1.000  
AbsCorr = GAUSSIAN

Data completeness= 0.850

Theta(max)= 30.190

R(reflections)= 0.0545( 1692)

wR2(reflections)=

wR= 0.0682( 3310)

S = 1.410

Npar= 199

---

The following ALERTS were generated. Each ALERT has the format

**test-name\_ALERT\_alert-type\_alert-level.**

Click on the hyperlinks for more details of the test.

---

### ● Alert level B

PLAT306\_ALERT\_2\_B Isolated Oxygen Atom (H-atoms Missing ?) ..... 0014 Check  
PLAT306\_ALERT\_2\_B Isolated Oxygen Atom (H-atoms Missing ?) ..... 0015 Check

---

### ● Alert level C

ABSTY02\_ALERT\_1\_C An \_exptl\_absorpt\_correction\_type has been given without  
a literature citation. This should be contained in the  
\_exptl\_absorpt\_process\_details field.

Absorption correction given as gaussian

PLAT041\_ALERT\_1\_C Calc. and Reported SumFormula Strings Differ Please Check  
PLAT068\_ALERT\_1\_C Reported F000 Differs from Calcd (or Missing)... Please Check  
PLAT077\_ALERT\_4\_C Unitcell Contains Non-integer Number of Atoms .. Please Check  
PLAT127\_ALERT\_1\_C Implicit Hall Symbol Inconsistent with Explicit -P -2xab;- Check

---

### ● Alert level G

FORMU01\_ALERT\_2\_G There is a discrepancy between the atom counts in the  
\_chemical\_formula\_sum and the formula from the \_atom\_site\* data.

Atom count from \_chemical\_formula\_sum: Al0.97 F1 Fe0.32 K0.47 Mn1 O15.5

Atom count from the \_atom\_site data: Al0.966 F1 Fe0.315 K0.473 Mn1 O1

CELLZ01\_ALERT\_1\_G Difference between formula and atom\_site contents detected.

CELLZ01\_ALERT\_1\_G ALERT: check formula stoichiometry or atom site occupancies.

From the CIF: \_cell\_formula\_units\_Z 8

From the CIF: \_chemical\_formula\_sum K0.47 Mn Fe0.32 Ti0.22 Al0.97 P2 O

TEST: Compare cell contents of formula and atom\_site data

| atom | Z*formula | cif sites | diff  |
|------|-----------|-----------|-------|
| K    | 3.76      | 3.78      | -0.02 |
| Mn   | 8.00      | 8.00      | 0.00  |
| Fe   | 2.56      | 2.52      | 0.04  |
| Ti   | 1.76      | 1.75      | 0.01  |
| Al   | 7.76      | 7.73      | 0.03  |
| P    | 16.00     | 16.00     | 0.00  |
| O    | 124.00    | 124.22    | -0.22 |
| F    | 8.00      | 8.00      | 0.00  |

PLAT004\_ALERT\_5\_G Polymeric Structure Found with Maximum Dimension 2 Info

PLAT005\_ALERT\_5\_G No Embedded Refinement Details Found in the CIF Please Do !

PLAT017\_ALERT\_1\_G Check Scattering Type Consistency of M1 as MN

PLAT017\_ALERT\_1\_G Check Scattering Type Consistency of M2A as AL

PLAT017\_ALERT\_1\_G Check Scattering Type Consistency of M2B as FE

PLAT017\_ALERT\_1\_G Check Scattering Type Consistency of M3A as AL

PLAT017\_ALERT\_1\_G Check Scattering Type Consistency of M3B as TI

PLAT045\_ALERT\_1\_G Calculated and Reported Z Differ by a Factor ... 0.125 Check

PLAT301\_ALERT\_3\_G Main Residue Disorder .....(Resd 1 ) 11% Note

PLAT302\_ALERT\_4\_G Anion/Solvent/Minor-Residue Disorder (Resd 2 ) 100% Note

|                                                                    |              |
|--------------------------------------------------------------------|--------------|
| PLAT302_ALERT_4_G Anion/Solvent/Minor-Residue Disorder (Resd 5 )   | 100% Note    |
| PLAT311_ALERT_2_G Isolated Disordered Oxygen Atom (No H's ?) ..... | 0w Check     |
| PLAT720_ALERT_4_G Number of Unusual/Non-Standard Labels .....      | 21 Note      |
| PLAT808_ALERT_5_G No Parseable SHELXL Style Weighting Scheme Found | Please Check |
| PLAT883_ALERT_1_G No Info/Value for _atom_sites_solution_primary . | Please Do !  |
| PLAT951_ALERT_5_G Calculated (ThMax) and CIF-Reported Kmax Differ  | 3 Units      |
| PLAT966_ALERT_5_G Note: Non-Standard (i.e. 2.0) OMIT Threshold of  | 3.0 Sig(I)   |

---

0 **ALERT level A** = Most likely a serious problem - resolve or explain  
2 **ALERT level B** = A potentially serious problem, consider carefully  
5 **ALERT level C** = Check. Ensure it is not caused by an omission or oversight  
20 **ALERT level G** = General information/check it is not something unexpected

13 ALERT type 1 CIF construction/syntax error, inconsistent or missing data  
4 ALERT type 2 Indicator that the structure model may be wrong or deficient  
1 ALERT type 3 Indicator that the structure quality may be low  
4 ALERT type 4 Improvement, methodology, query or suggestion  
5 ALERT type 5 Informative message, check

---

### Validation response form

Please find below a validation response form (VRF) that can be filled in and pasted into your CIF.

```
# start Validation Reply Form
_vrf_ABSTY02_I
;
PROBLEM: An _exptl_absorpt_correction_type has been given without
RESPONSE: ...
;
_vrf_PLAT306_I
;
PROBLEM: Isolated Oxygen Atom (H-atoms Missing ?) .....
```

|            |
|------------|
| 0014 Check |
|------------|

```
RESPONSE: ...
;
_vrf_PLAT041_I
;
PROBLEM: Calc. and Reported SumFormula Strings Differ
```

|              |
|--------------|
| Please Check |
|--------------|

```
RESPONSE: ...
;
_vrf_PLAT068_I
;
PROBLEM: Reported F000 Differs from Calcd (or Missing)...
```

|              |
|--------------|
| Please Check |
|--------------|

```
RESPONSE: ...
;
_vrf_PLAT077_I
;
PROBLEM: Unitcell Contains Non-integer Number of Atoms ..
```

|              |
|--------------|
| Please Check |
|--------------|

```
RESPONSE: ...
;
_vrf_PLAT127_I
;
PROBLEM: Implicit Hall Symbol Inconsistent with Explicit -P -2xab;- Check
RESPONSE: ...
;
# end Validation Reply Form
```

---

It is advisable to attempt to resolve as many as possible of the alerts in all categories. Often the minor alerts point to easily fixed oversights, errors and omissions in your CIF or refinement strategy, so attention to these fine details can be worthwhile. In order to resolve some of the more serious problems it may be necessary to carry out additional measurements or structure refinements. However, the purpose of your study may justify the reported deviations and the more serious of these should normally be commented upon in the discussion or experimental section of a paper or in the "special\_details" fields of the CIF. checkCIF was carefully designed to identify outliers and unusual parameters, but every test has its limitations and alerts that are not important in a particular case may appear. Conversely, the absence of alerts does not guarantee there are no aspects of the results needing attention. It is up to the individual to critically assess their own results and, if necessary, seek expert advice.

### **Publication of your CIF in IUCr journals**

A basic structural check has been run on your CIF. These basic checks will be run on all CIFs submitted for publication in IUCr journals (*Acta Crystallographica*, *Journal of Applied Crystallography*, *Journal of Synchrotron Radiation*); however, if you intend to submit to *Acta Crystallographica Section C* or *E* or *IUCrData*, you should make sure that full publication checks are run on the final version of your CIF prior to submission.

### **Publication of your CIF in other journals**

Please refer to the *Notes for Authors* of the relevant journal for any special instructions relating to CIF submission.

---

**PLATON version of 18/05/2022; check.def file version of 17/05/2022**

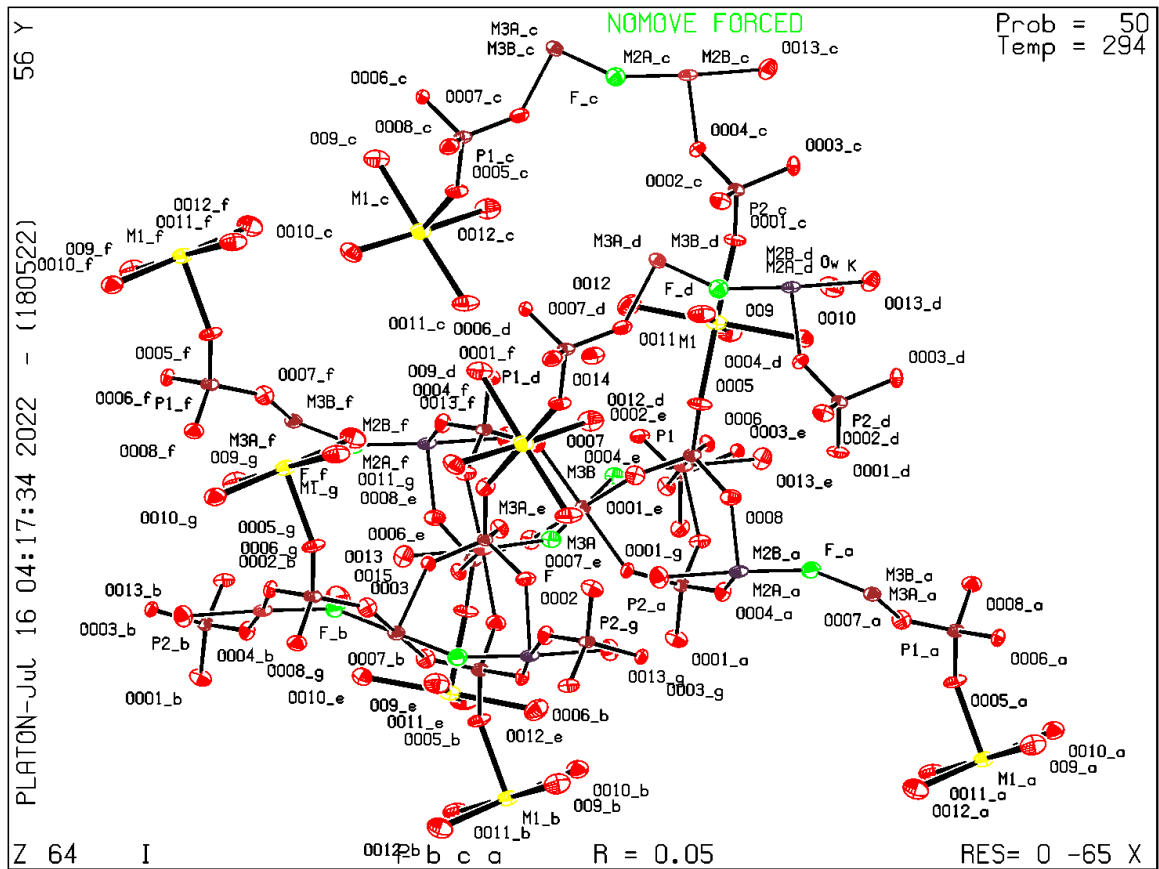

Supplement: Supplementary file 1 [file ejm-35-189-2023-supplement.pdf]
